# Supplementary material
Source: Springer Nature journal article supplement (https://www.springermedizin.de/resource/supplementary/13075_2012_4013_MOESM10_ESM.pdf/9695840)

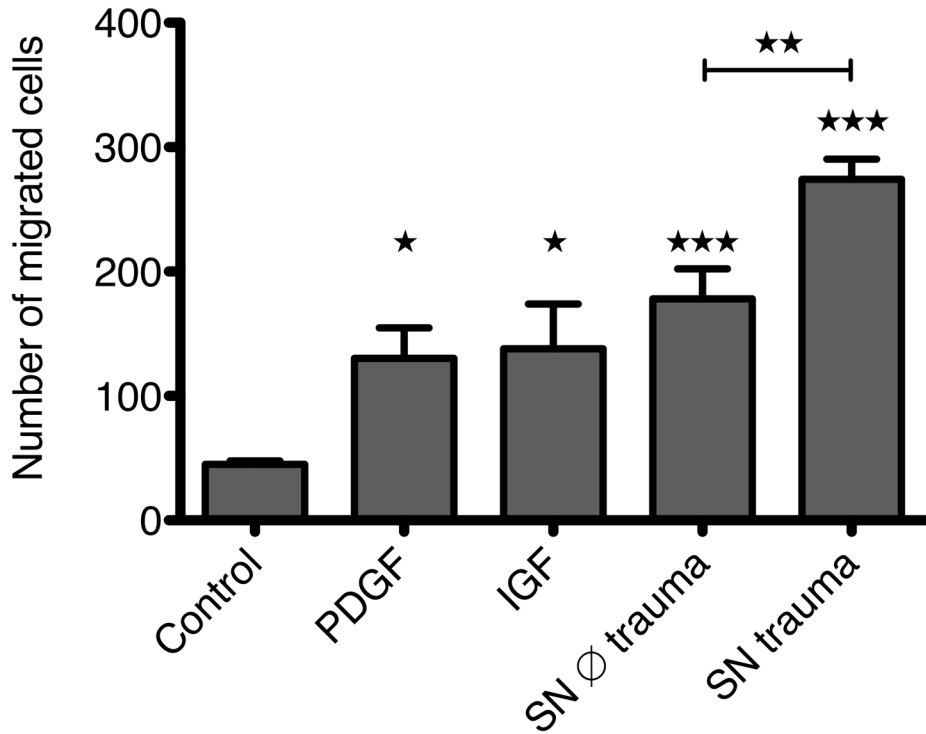

Supplement: MOESM10 [file 9695840]
